# Supplementary material for: Ultra-wide band near-infrared (NIR) optical thermometry (12–673 K) performance enhanced by Stark sublevel splitting in Er3+ ions near the first biological window in the PbZr0.53Ti0.47O3:Er3+/Yb3+ phosphor
Source: Royal Society of Chemistry journal article supplement (doi:10.1039/d4cp03125c), 2024-11-21
Supplement: d4cp03125c1.pdf [file d4cp03125c1.pdf]

### Electronic supplementary information (ESI)

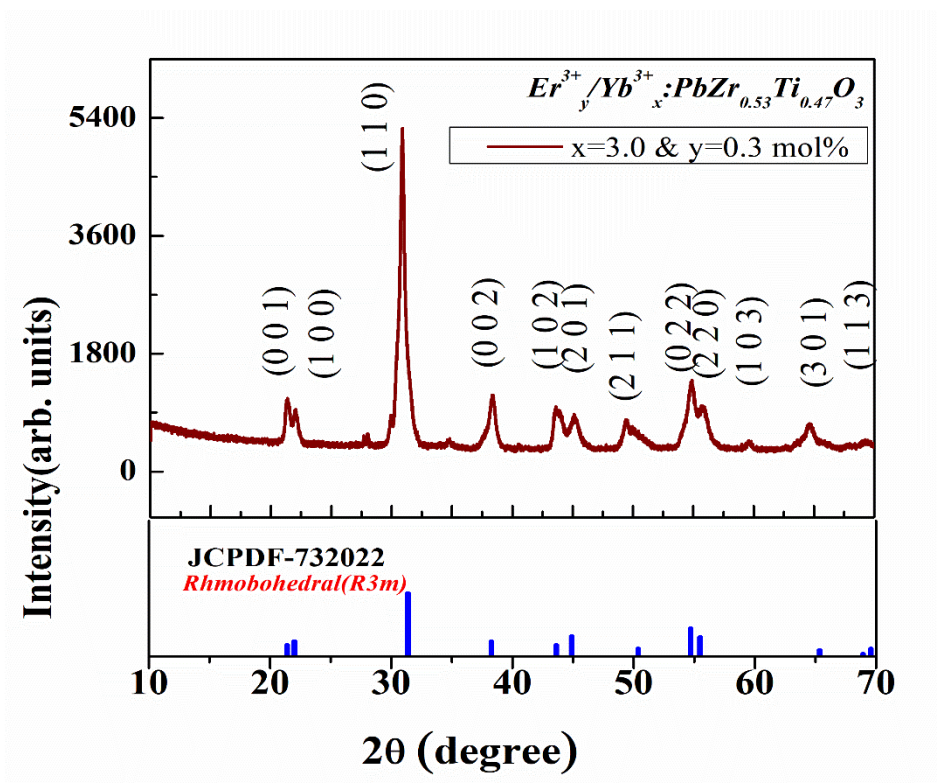

ESI:S1: Powder XRD pattern of  $Er^{3+}/Yb^{3+}:PbZr_{0.53}Ti_{0.47}O_3$  sample synthesized via low temperature assisted combustion reaction route along with their standard profile(JCPDS) data.
